# Supplementary material for: Hierarchically Structured Hybrid Membranes for Continuous Wastewater Treatment via the Integration of Adsorption and Membrane Ultrafiltration Mechanisms
Source: MDPI journal article supplement (doi:10.3390/polym15010156), 2022-12-29
Supplement: s1 [file s1]

Article

# Hierarchically Structured Hybrid Membranes for Continuous Wastewater Treatment via the Integration of Adsorption and Membrane Ultrafiltration Mechanisms

Roberto Scaffaro <sup>1,\*</sup> Michele Gammino <sup>1</sup> and Andrea Maio <sup>1,\*</sup>

<sup>1</sup> Department of Engineering-Research Unit INSTM, University of Palermo, Viale delle Scienze, 90128 Palermo, Italy

\* Correspondence: roberto.scaffaro@unipa.it (R.S.); andrea.maio@unipa.it (A.M.)

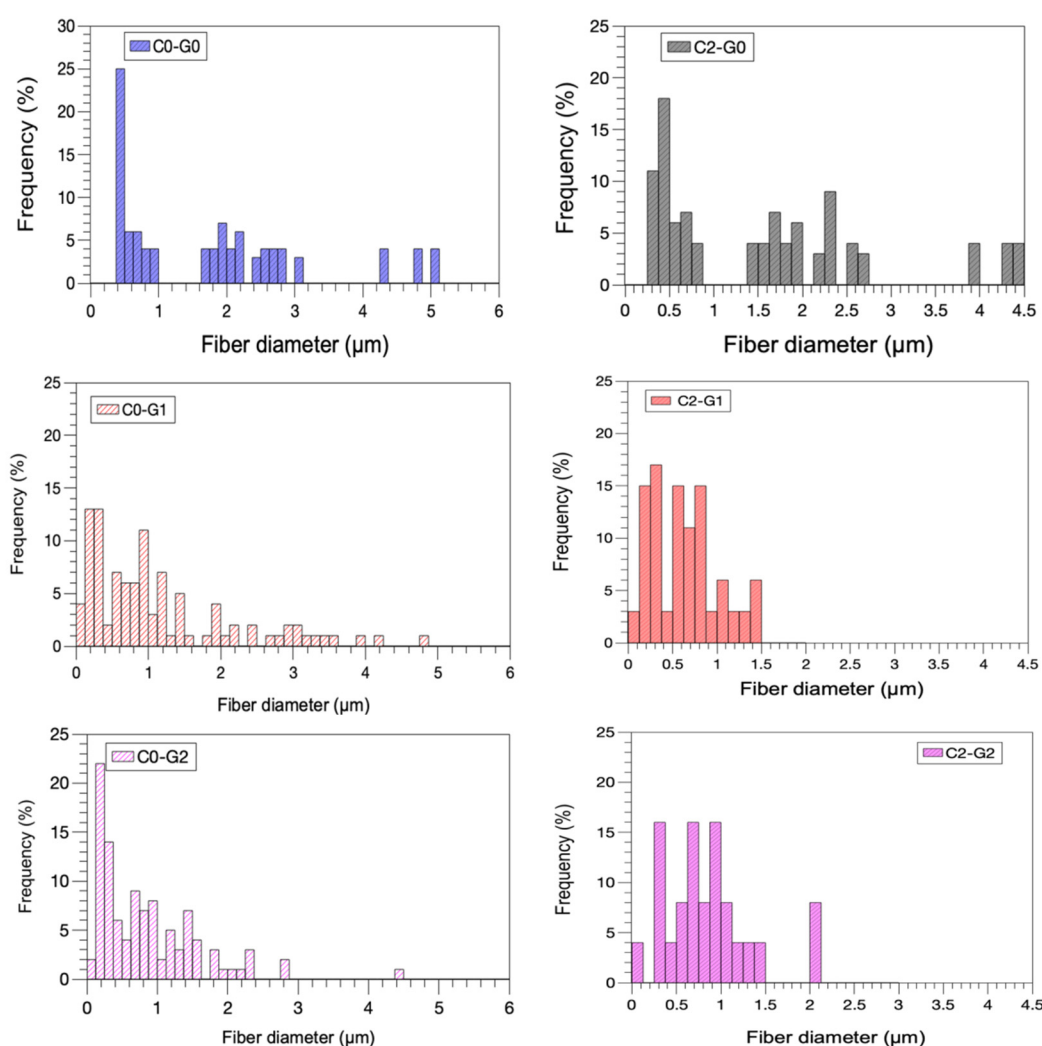

**Figure S1.** Size distribution of fiber diameter for the samples investigated.

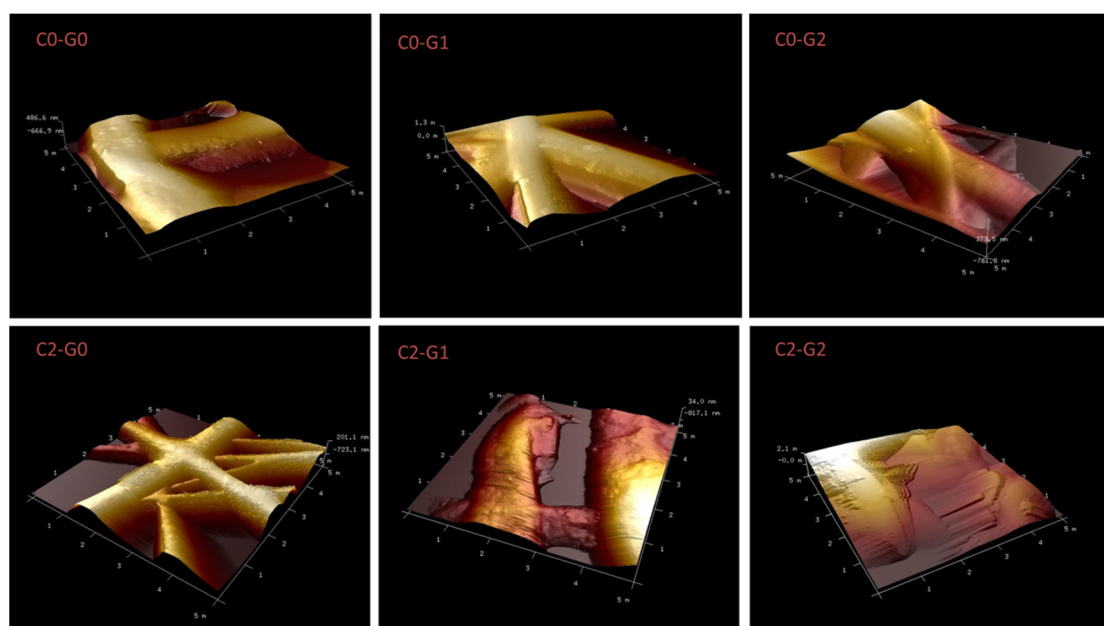

**Figure S2.** 3D view of AFM images recorded on squared regions (5 μm per side) of the samples.

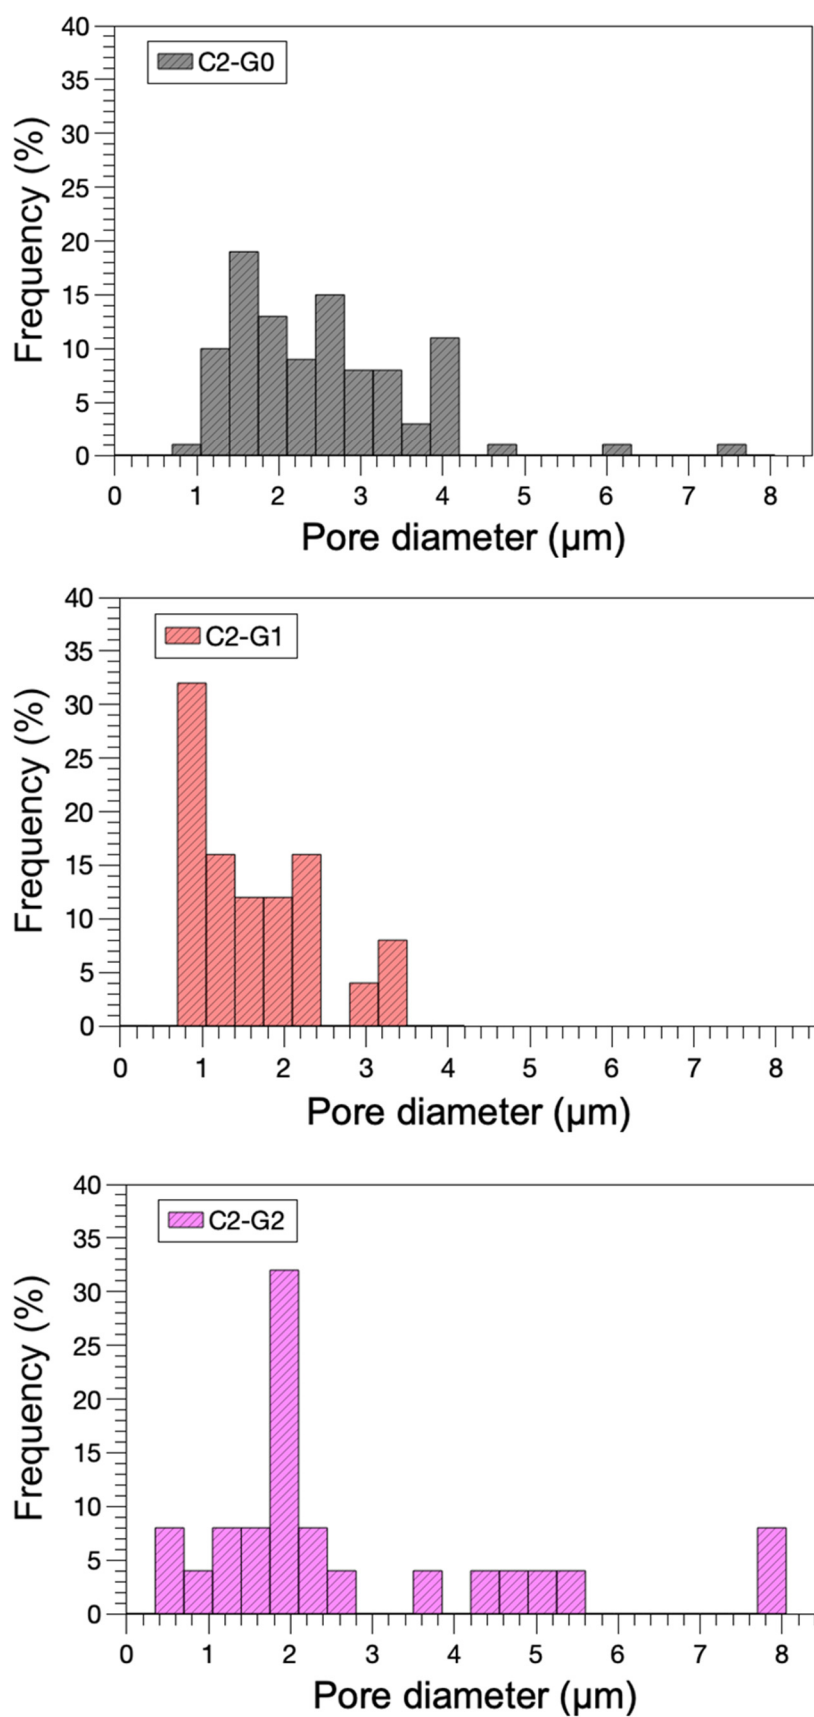

**Figure S3.** Pore diameter distribution of the membranes measured by Image analysis on the top surface.
